# Supplementary material for: Quantifying river water contributions to the transpiration of riparian trees along a losing river: lessons from stable isotopes and an iteration method
Source: Copernicus journal article supplement (doi:10.5194/hess-27-3405-2023), 2023-09-26
Supplement: Supplementary file 1 [file hess-27-3405-2023-supplement.pdf]

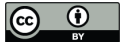

*Supplement of*

## **Quantifying river water contributions to the transpiration of riparian trees along a losing river: lessons from stable isotopes and an iteration method**

**Yue Li et al.**

*Correspondence to:* Ying Ma ([maying@igsnr.ac.cn](mailto:maying@igsnr.ac.cn))

The copyright of individual parts of the supplement might differ from the article licence.

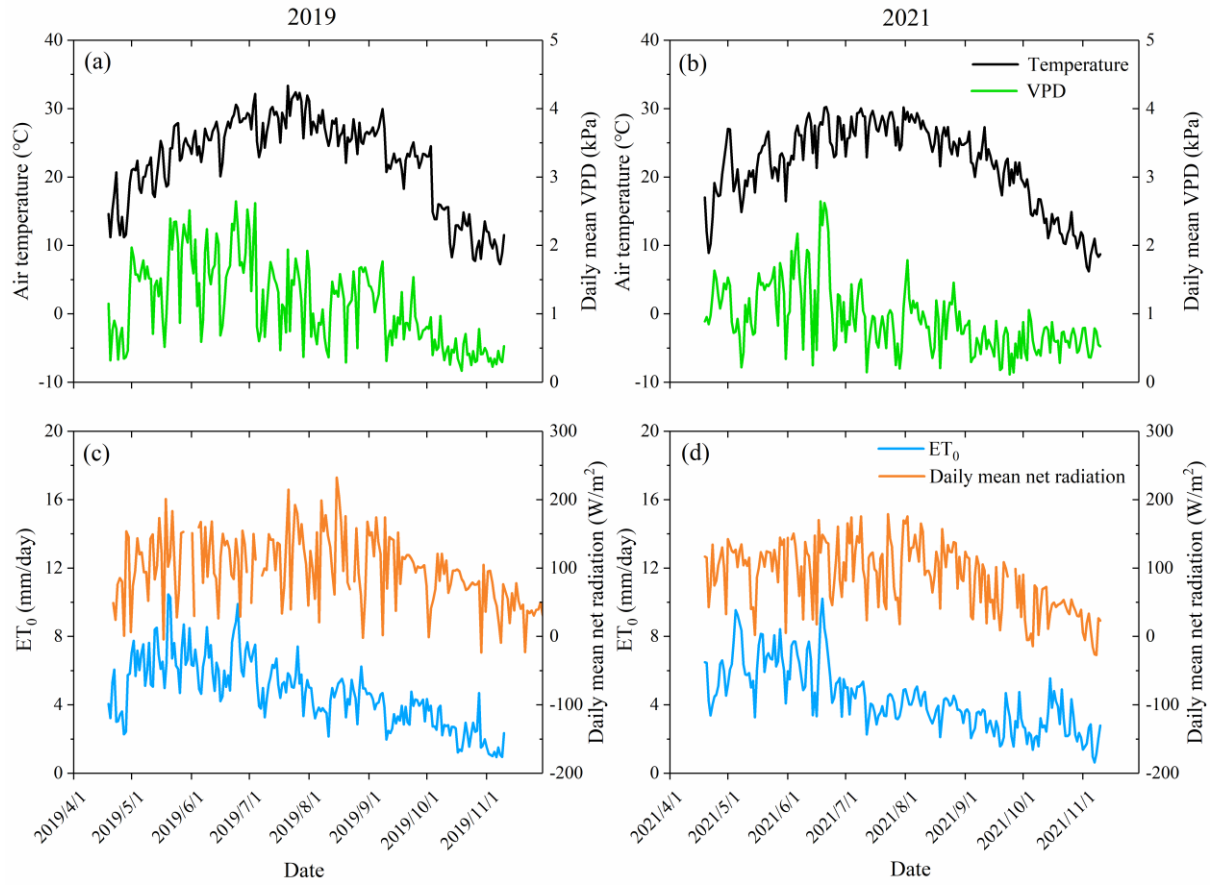

**Figure S1: Daily mean temperature (°C) and daily mean vapor pressure deficit (VPD) (kPa) are shown in panels (a) and (b). Daily reference evapotranspiration ( $ET_0$ ) (mm/day) and daily mean net radiation ( $W/m^2$ ) are shown in panels (c) and (d).**

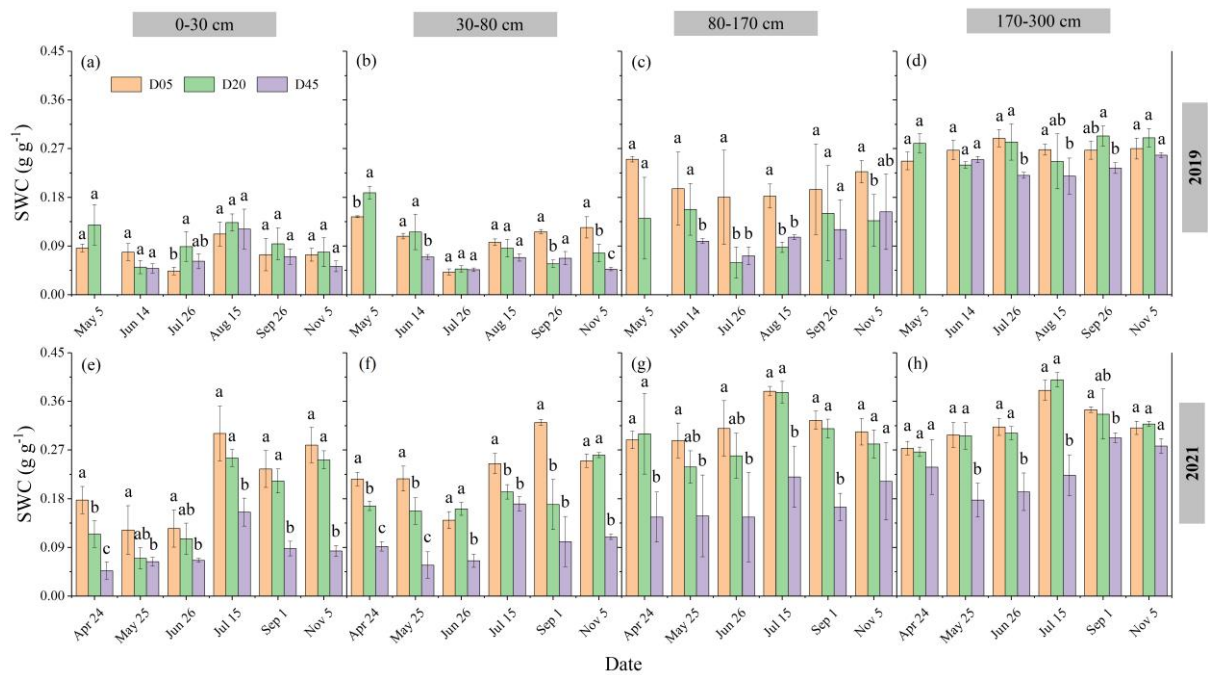

**Figure S2: Seasonal variations of soil water content (SWC) in the 0–30 cm, 30–80 cm, 80–170 cm, and 170–300 cm layers on the sampling campaigns in 2019 (a–d) and 2021 (e–h). Different letters (a, b, and c) show a significant difference in the SWC between three plots ( $p < 0.05$ ). D05, D20, and D45 are the plots at distance of 5 m, 20 m, and 45 m away from the riverbank, respectively.**

10
